# Supplementary material for: Tissue-specific T cell profiles in Mycobacterium tuberculosis uninfected IGRA negative and positive individuals
Source: Frontiers journal article supplement (doi:10.3389/ftubr.2025.1535945), 2025-03-06
Supplement: Table_1.pdf [file Table_1.pdf]

**Table 1. Patient Demographics and clinical characteristics**

| Demographic                                                                    | Male (TSPOT+) <sup>a</sup> | Female (TSPOT+) | Total (TSPOT+) |
|--------------------------------------------------------------------------------|----------------------------|-----------------|----------------|
| Age range                                                                      |                            |                 |                |
| 18-35                                                                          | 26 (10)                    | 4 (2)           | 30 (12)        |
| 36-55                                                                          | 10 (5)                     | 5 (3)           | 15 (8)         |
| ≥56                                                                            | 4 (4)                      | 3 (1)           | 7 (5)          |
| Cause of death                                                                 |                            |                 |                |
| Trauma                                                                         |                            |                 |                |
| Head trauma                                                                    | 30 (11)                    | 7 (4)           | 37 (15)        |
| Abdominal trauma                                                               | 9 (8)                      | 0 ( )           | 9 (8)          |
| Gunshot                                                                        | 1 (0)                      | 0 ( )           | 1 (0)          |
| Non trauma                                                                     |                            |                 |                |
| Intestinal obstruction                                                         | 0 (0)                      | 2 (1)           | 2 (1)          |
| Duodenal ulcers                                                                | 0 (0)                      | 3 (1)           | 3 (1)          |
| Employment                                                                     |                            |                 |                |
| Skilled labourer (plumber, electrician, welder, mechanic, construction worker) | 8 (4)                      | 0               | 8 (4)          |
| Military/police                                                                | 7 (3)                      | 1 (0)           | 8 (3)          |
| Business person/owner                                                          | 10 (5)                     | 5 (3)           | 15 (8)         |
| Farmer or animal husbandry                                                     | 3 (1)                      | 1 (1)           | 4 (2)          |
| Health care worker                                                             | 2 (1)                      | 3 (1)           | 5 (2)          |
| Bar or restaurant worker                                                       | 6 (2)                      | 2 (1)           | 8 (3)          |
| Truckdriver/driver/conductor                                                   | 2 (2)                      | 0               | 2 (2)          |
| Not employed                                                                   | 2 (1)                      | 0               | 2 (1)          |
| Smoking/substance use                                                          |                            |                 |                |
| Tobacco                                                                        | 3 (3)                      | 0               | 3 (3)          |
| Other drug                                                                     | 4 (1)                      | 0               | 4 (1)          |
| Not known                                                                      | 2 (2)                      | 4 (3)           | 6 (5)          |
| None                                                                           | 31 (13)                    | 8 (3)           | 39 (16)        |
| Alcohol use                                                                    |                            |                 |                |
| Yes                                                                            | 18 (10)                    | 4 (1)           | 22 (11)        |
| No                                                                             | 22 (9)                     | 8 (5)           | 30 (14)        |
| Blood transfusion                                                              |                            |                 |                |

|                  |         |        |         |
|------------------|---------|--------|---------|
| Yes              | 0 (0)   | 1 (0)  | 1 (0)   |
| No               | 40 (19) | 11 (6) | 51 (25) |
| Time in hospital |         |        |         |
| Death on arrival | 8 (6)   | 2 (2)  | 10 (8)  |
| <1day            | 26 (11) | 10 (4) | 36 (15) |
| 1-7days          | 5 (2)   | 0      | 5 (2)   |
| >7days           | 1 (0)   | 0      | 1 (0)   |

<sup>a</sup>Total in group (number that were TSPOT+ in group)
